# Supplementary material
Source: HighWire-hosted journal article supplement (https://fn.bmj.com/content/107/1/26)
Supplement: inline-supplementary-material-4 [file inline-supplementary-material-4.pdf]

**Supplement 4. Actual Mean Glucose Infusion Rate (GIR) by day (g/kg/day)**

| GIR mean ev      | CLG         | STG         | P value |
|------------------|-------------|-------------|---------|
| Day 1; mean (SD) | 6.45 (0.79) | 6.44 (0.97) | .96     |
| Day 2; mean (SD) | 7.11 (0.8)  | 7.52 (1.22) | .18     |
| Day 3; mean (SD) | 7.66 (0.99) | 7.94 (1.35) | .42     |
| Day 4; mean (SD) | 8.09 (1.29) | 8.35 (1.61) | .55     |
| Day 5; mean (SD) | 8.96 (1.63) | 8.55 (1.58) | .39     |
| Day 6; mean (SD) | 9.36 (1.82) | 9.06 (2.18) | .61     |
| Mean (SD)        | 7.94 (1.10) | 7.98 (0.92) | .95     |
