# Supplementary material
Source: HighWire-hosted journal article supplement (https://fn.bmj.com/content/107/1/26)

**Supplement 2.** CGMS: sensor and transmitter

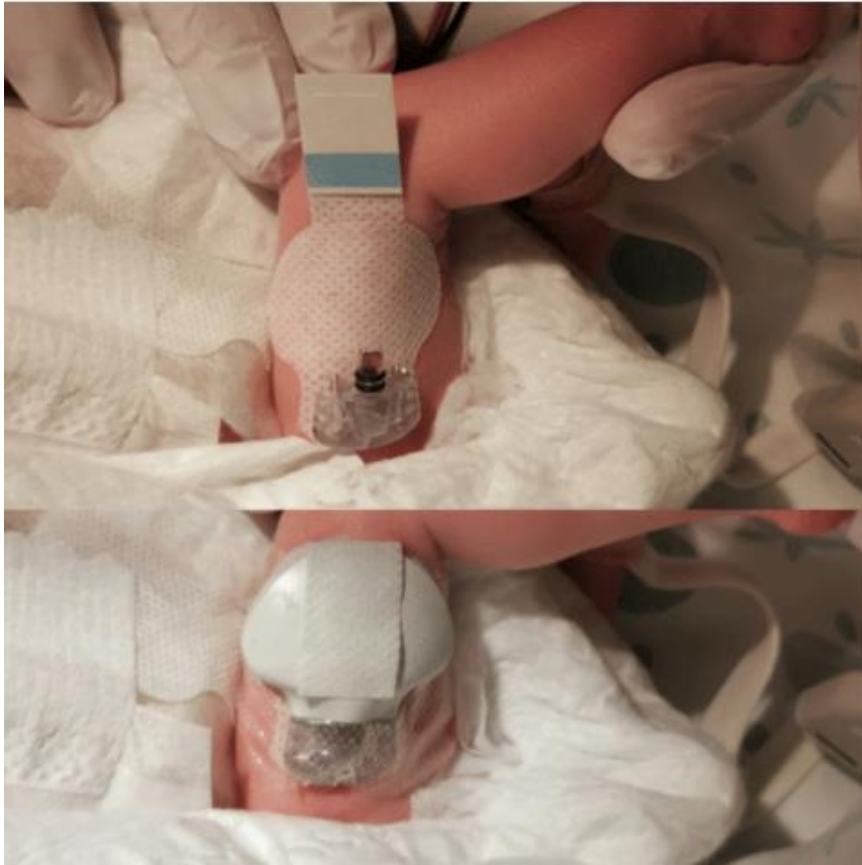

Supplement: inline-supplementary-material-2 [file inline-supplementary-material-2.pdf]

**Supplement 3. Mean Glucose Infusion Rate by Day of Life (g/kg/day)**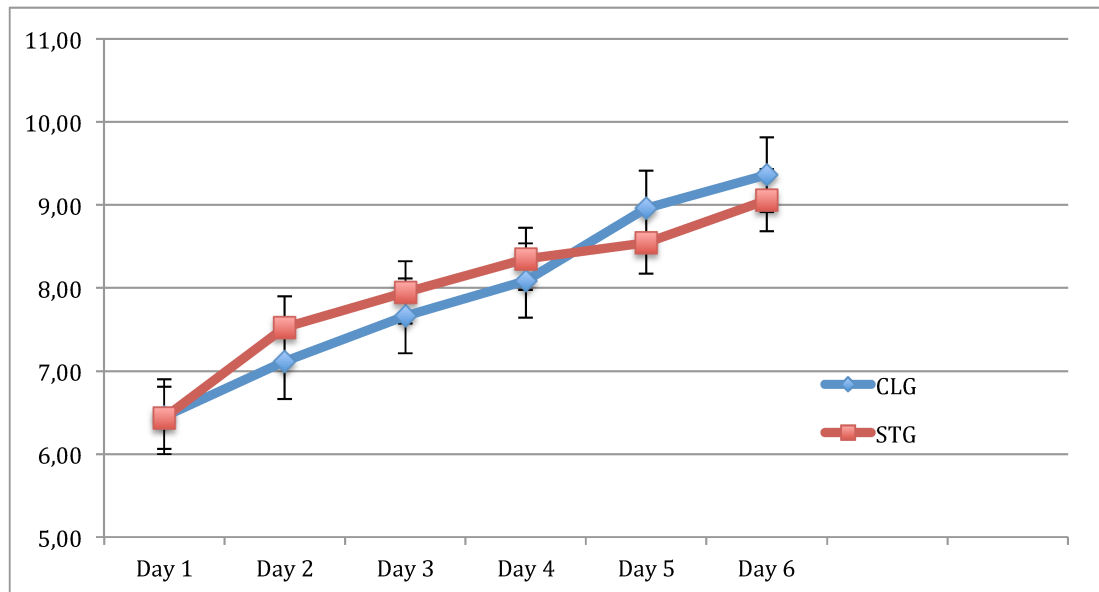

Supplement: inline-supplementary-material-3 [file inline-supplementary-material-3.pdf]

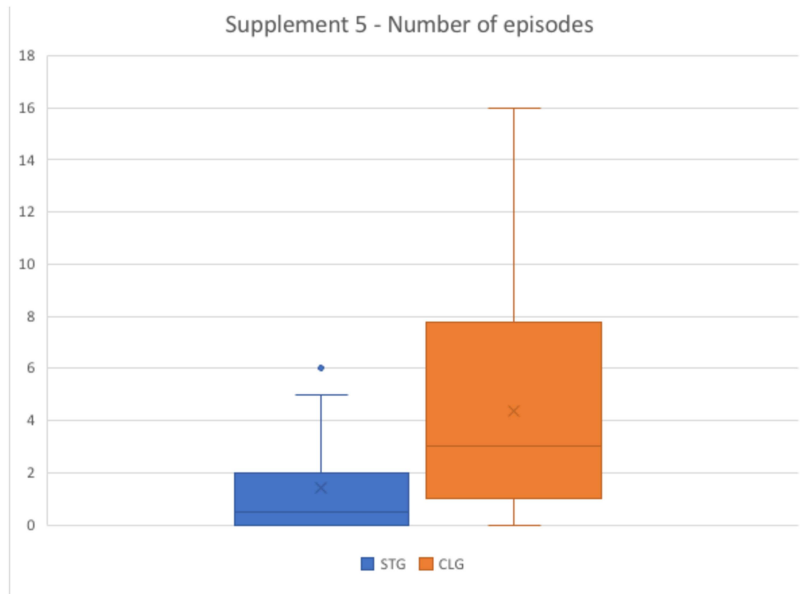

Supplement: inline-supplementary-material-5 [file inline-supplementary-material-5.pdf]
